# Supplementary material for: Nb-Doped nickel nitride-derived catalysts for electrochemical water splitting
Source: Royal Society of Chemistry journal article supplement (doi:10.1039/d1cy01085a), 2021-01-01
Supplement: d1cy01085a1.pdf [file d1cy01085a1.pdf]

Supporting Information for

## **Nb-doped Nickel Nitride-Derived Catalysts for Electrochemical Water Splitting**

Jiadong Xiang<sup>#</sup>, Wenjian Zou<sup>#</sup>, Hao Tang\*

State Key Laboratory of Advanced Technology for Materials Synthesis and Processing,  
International School of Materials Science and Engineering, Wuhan University of  
Technology, Wuhan 430070, People's Republic of China

\*Corresponding Authors

E-mail: tanghaotc@gmail.com (Hao Tang)

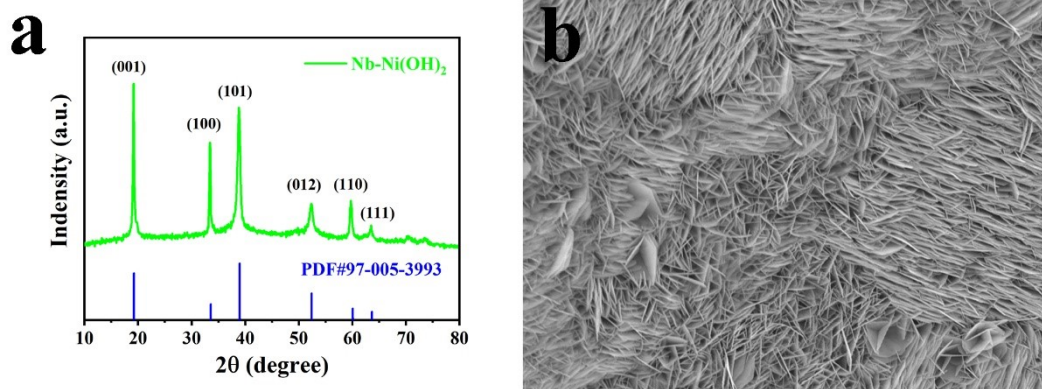

**Fig. S1.** (a) XRD pattern of  $\text{Nb-Ni(OH)}_2$ . (b) SEM image of  $\text{Nb-Ni(OH)}_2/\text{NF}$ .

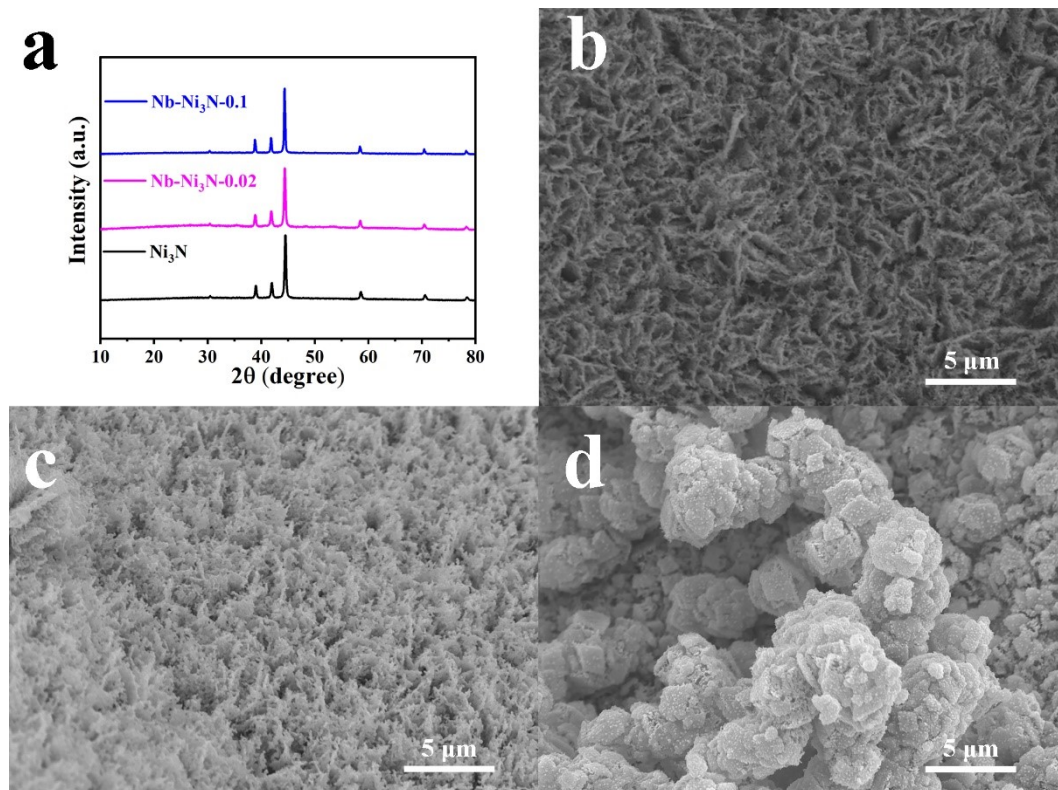

**Fig. S2.** a) XRD patterns, b) SEM image of undoped Ni<sub>3</sub>N. c) SEM image of Nb-Ni<sub>3</sub>N-0.02, d) SEM image of Nb-Ni<sub>3</sub>N-0.1.

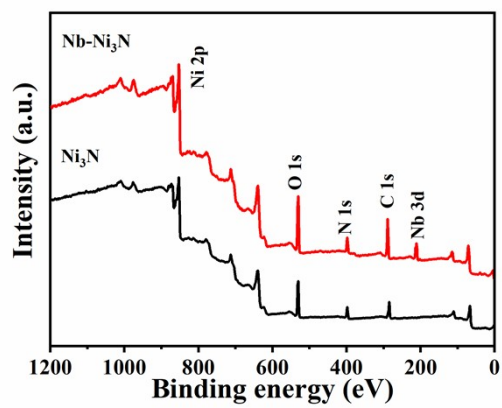

**Fig. S3** The XPS survey spectra.

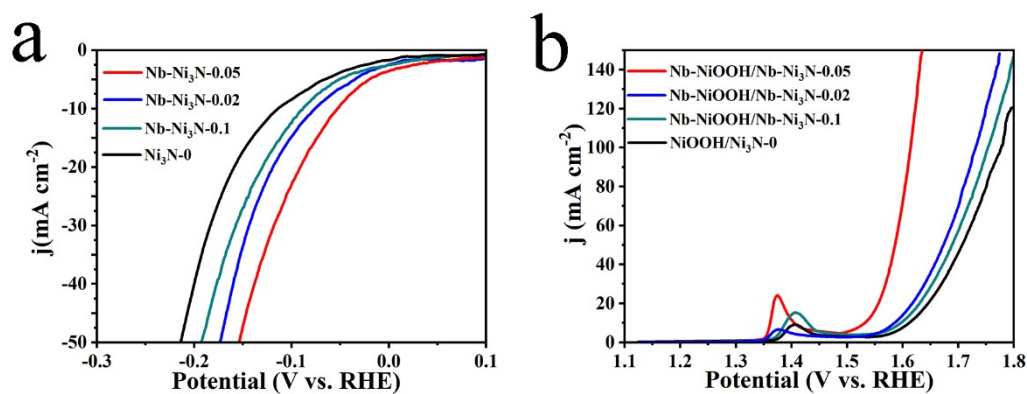

**Fig. S4.** (a) LSV curve of Nb-Ni<sub>3</sub>N-x/NF (x= 0, 0.02, 0.05,0.1) for HER. (b) LSV curve of Nb-NiOOH/Nb-Ni<sub>3</sub>N-x (x= 0, 0.02, 0.05,0.1) for OER.

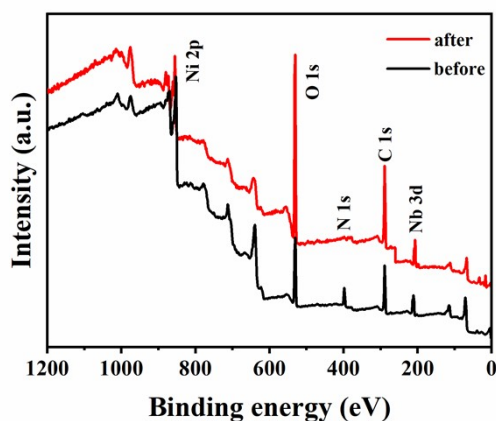

**Fig S5.** XPS full survey spectra of Nb-Ni<sub>3</sub>N/NF before and after 3-h OER stability test.

**Table S1.** EIS fitting parameters from equivalent circuit of samples for HER at 50 mV overpotential and OER at 300 mV overpotential.

| samples                         | $R_{ct}$ | $R_s$ | CPE-T    | CPE-P   |
|---------------------------------|----------|-------|----------|---------|
| Nb-Ni <sub>3</sub> N-0.05       | 6.41     | 1.054 | 0.019971 | 0.75294 |
| Ni <sub>3</sub> N               | 14.16    | 1.197 | 0.02055  | 0.77825 |
| Nb-NiOOH/Ni <sub>3</sub> N-0.05 | 6.38     | 1.054 | 0.18806  | 0.53487 |
| NiOOH/Ni <sub>3</sub> N         | 10.14    | 1.102 | 0.095753 | 0.69642 |

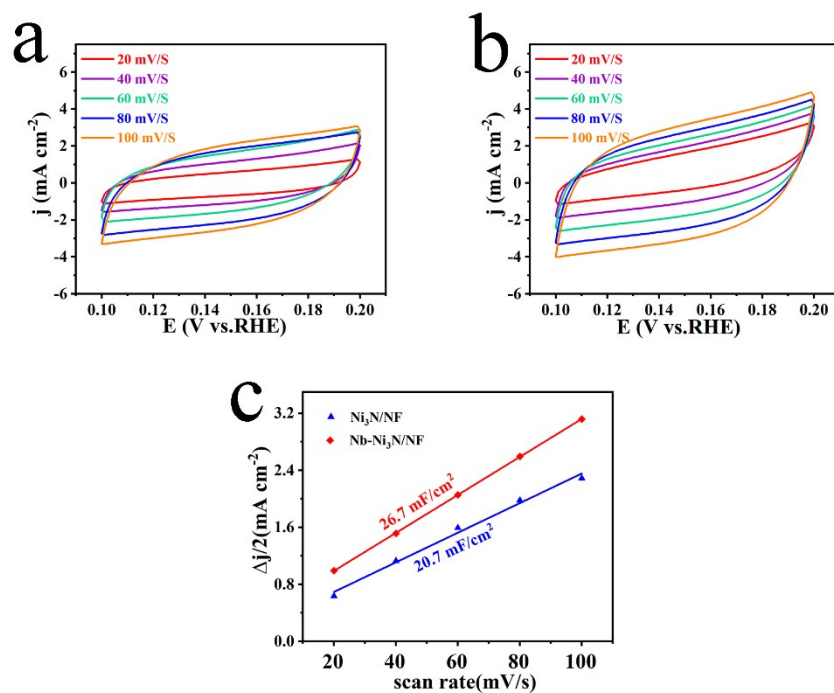

**Fig S6.** CV scans for HER of (a)  $\text{Ni}_3\text{N}/\text{NF}$ , (b)  $\text{Nb-Ni}_3\text{N-0.05}/\text{NF}$  and (c) the capacitive current at 0.15 V vs. RHE.

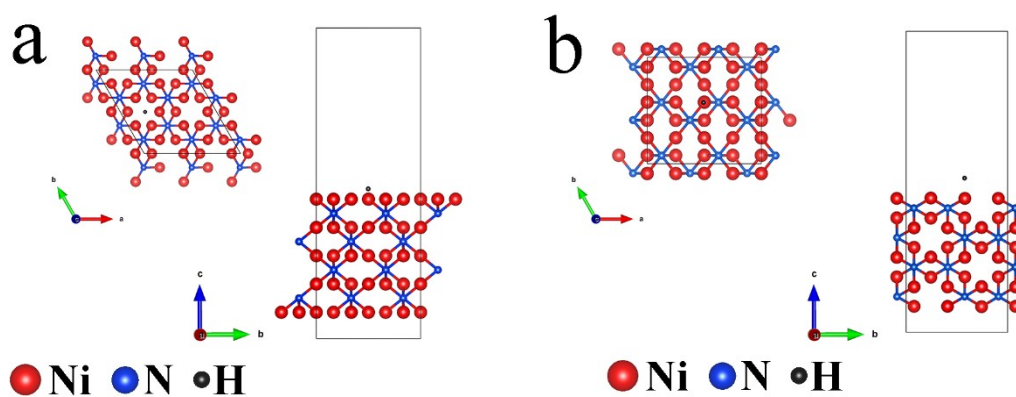

**Fig. S7** (a) the geometric configuration of  $\text{Ni}_3\text{N}$  (002). (b) the geometric configuration of  $\text{Ni}_3\text{N}$  (110).

**Table S2.** atomic coordinates of Nb-Ni<sub>3</sub>N (002)

|      | X       | Y        | Z       |
|------|---------|----------|---------|
| Ni1  | 0.08357 | 0.33595  | 0.08751 |
| Ni2  | 0.06843 | 0.32738  | 0.2621  |
| Ni3  | 0.07466 | 0.3415   | 0.45013 |
| Ni4  | 0.40919 | 0.16845  | 0.17502 |
| Ni5  | 0.40926 | 0.15367  | 0.36025 |
| Ni6  | 0.07832 | -0.00319 | 0.17463 |
| Ni7  | 0.07599 | -0.00747 | 0.35889 |
| Ni8  | 0.23723 | 0.15719  | 0.08746 |
| Ni9  | 0.23381 | 0.15129  | 0.264   |
| Ni10 | 0.25319 | 0.16132  | 0.44981 |
| Ni11 | 0.40718 | 0.00688  | 0.08758 |
| Ni12 | 0.40836 | 0.00899  | 0.26386 |
| Ni13 | 0.40091 | -0.01045 | 0.4465  |
| Ni14 | 0.24108 | 0.33221  | 0.17377 |
| Ni15 | 0.58564 | 0.3354   | 0.08728 |
| Ni16 | 0.58664 | 0.33581  | 0.26151 |
| Ni17 | 0.57804 | 0.33686  | 0.44811 |
| Ni18 | 0.90797 | 0.1665   | 0.17427 |
| Ni19 | 0.90329 | 0.15916  | 0.35924 |
| Ni20 | 0.57806 | -0.00245 | 0.17434 |
| Ni21 | 0.58577 | 0.01024  | 0.35726 |
| Ni22 | 0.73847 | 0.15882  | 0.08787 |
| Ni23 | 0.73493 | 0.15633  | 0.26402 |
| Ni24 | 0.75155 | 0.16477  | 0.44703 |
| Ni25 | 0.90753 | 0.00517  | 0.0878  |
| Ni26 | 0.91098 | 0.00224  | 0.26659 |
| Ni27 | 0.88774 | -0.01907 | 0.44907 |
| Ni28 | 0.74539 | 0.33401  | 0.17439 |
| Ni29 | 0.73822 | 0.3212   | 0.35999 |
| Ni30 | 0.0853  | 0.83621  | 0.08768 |
| Ni31 | 0.07707 | 0.83082  | 0.26654 |
| Ni32 | 0.07684 | 0.85206  | 0.44819 |
| Ni33 | 0.41205 | 0.6699   | 0.17028 |
| Ni34 | 0.07879 | 0.50042  | 0.17549 |
| Ni35 | 0.23743 | 0.65955  | 0.0872  |
| Ni36 | 0.24066 | 0.66892  | 0.26593 |
| Ni37 | 0.25169 | 0.66726  | 0.45184 |
| Ni38 | 0.40701 | 0.50367  | 0.08775 |
| Ni39 | 0.40432 | 0.48712  | 0.44976 |
| Ni40 | 0.243   | 0.83571  | 0.1751  |
| Ni41 | 0.24069 | 0.84277  | 0.35894 |

|      |         |         |         |
|------|---------|---------|---------|
| Ni42 | 0.5849  | 0.83751 | 0.08738 |
| Ni43 | 0.58362 | 0.84087 | 0.26523 |
| Ni44 | 0.58143 | 0.85492 | 0.45023 |
| Ni45 | 0.90794 | 0.66642 | 0.17409 |
| Ni46 | 0.91494 | 0.67553 | 0.35662 |
| Ni47 | 0.58218 | 0.49911 | 0.17262 |
| Ni48 | 0.73906 | 0.65915 | 0.0873  |
| Ni49 | 0.74576 | 0.66742 | 0.26654 |
| Ni50 | 0.76835 | 0.67044 | 0.45194 |
| Ni51 | 0.90777 | 0.50433 | 0.08812 |
| Ni52 | 0.90542 | 0.50278 | 0.26438 |
| Ni53 | 0.89555 | 0.49201 | 0.44774 |
| Ni54 | 0.75235 | 0.84376 | 0.17308 |
| Ni55 | 0.75235 | 0.84487 | 0.35757 |
| Nb1  | 0.23588 | 0.31277 | 0.3618  |
| Nb2  | 0.42076 | 0.68903 | 0.3631  |
| Nb3  | 0.06597 | 0.49949 | 0.35934 |
| Nb4  | 0.40532 | 0.50078 | 0.26215 |
| Nb5  | 0.59789 | 0.5001  | 0.36254 |
| N1   | 0.4102  | 0.33212 | 0.12344 |
| N2   | 0.4182  | 0.31664 | 0.30854 |
| N3   | 0.07313 | 0.16106 | 0.21777 |
| N4   | 0.06204 | 0.14945 | 0.41695 |
| N5   | 0.9105  | 0.33388 | 0.12474 |
| N6   | 0.89752 | 0.31871 | 0.30851 |
| N7   | 0.578   | 0.16456 | 0.21663 |
| N8   | 0.57537 | 0.16131 | 0.41071 |
| N9   | 0.40927 | 0.83627 | 0.12368 |
| N10  | 0.40884 | 0.84835 | 0.30902 |
| N11  | 0.07399 | 0.66763 | 0.21815 |
| N12  | 0.0781  | 0.67913 | 0.41518 |
| N13  | 0.91151 | 0.83363 | 0.12396 |
| N14  | 0.91262 | 0.83834 | 0.31086 |
| N15  | 0.58612 | 0.67662 | 0.21595 |
| N16  | 0.59606 | 0.67652 | 0.4173  |
| H1   | 0.247   | 0.499   | 0.48305 |

**Table S3.** atomic coordinates of Nb-Ni<sub>3</sub>N (110)

|      | X        | Y       | Z       |
|------|----------|---------|---------|
| Ni1  | 0.00026  | 0.74334 | 0.1495  |
| Ni2  | 0.00013  | 0.24387 | 0.25057 |
| Ni3  | 0.0072   | 0.73989 | 0.34825 |
| Ni4  | -0.00335 | 0.24637 | 0.44437 |
| Ni5  | 0.24979  | 0.74341 | 0.08986 |
| Ni6  | 0.25029  | 0.24336 | 0.18238 |
| Ni7  | 0.24859  | 0.73929 | 0.27913 |
| Ni8  | 0.25163  | 0.08059 | 0.09066 |
| Ni9  | 0.24973  | 0.57984 | 0.18379 |
| Ni10 | 0.25034  | 0.08049 | 0.28167 |
| Ni11 | 0.24765  | 0.58037 | 0.38131 |
| Ni12 | -0.00003 | 0.07601 | 0.14883 |
| Ni13 | -0.00127 | 0.57943 | 0.24824 |
| Ni14 | -0.00541 | 0.08185 | 0.34499 |
| Ni15 | 0.00125  | 0.58894 | 0.4407  |
| Ni16 | -0.0002  | 0.41142 | 0.14896 |
| Ni17 | 0.00364  | 0.90812 | 0.24728 |
| Ni18 | 0.00522  | 0.40908 | 0.34594 |
| Ni19 | -0.00745 | 0.90169 | 0.44315 |
| Ni20 | 0.24752  | 0.40732 | 0.0908  |
| Ni21 | 0.25045  | 0.90757 | 0.18383 |
| Ni22 | 0.24772  | 0.40954 | 0.28062 |
| Ni23 | 0.50027  | 0.74334 | 0.1495  |
| Ni24 | 0.50022  | 0.24416 | 0.25072 |
| Ni25 | 0.5073   | 0.73917 | 0.34827 |
| Ni26 | 0.49776  | 0.24777 | 0.44507 |
| Ni27 | 0.74977  | 0.74346 | 0.08988 |
| Ni28 | 0.75025  | 0.24327 | 0.18236 |
| Ni29 | 0.74872  | 0.7395  | 0.27904 |
| Ni30 | 0.75166  | 0.08056 | 0.09063 |
| Ni31 | 0.74972  | 0.57981 | 0.18379 |
| Ni32 | 0.75041  | 0.08054 | 0.2817  |
| Ni33 | 0.74756  | 0.58098 | 0.38113 |
| Ni34 | 0.50003  | 0.07602 | 0.14882 |
| Ni35 | 0.49872  | 0.57923 | 0.24818 |
| Ni36 | 0.49485  | 0.08189 | 0.34522 |
| Ni37 | 0.4993   | 0.58752 | 0.44584 |
| Ni38 | 0.4998   | 0.4114  | 0.14894 |
| Ni39 | 0.5037   | 0.90814 | 0.24721 |
| Ni40 | 0.50384  | 0.41192 | 0.34722 |
| Ni41 | 0.49309  | 0.89803 | 0.44488 |



|      |         |         |         |
|------|---------|---------|---------|
| Ni42 | 0.74757 | 0.40729 | 0.09078 |
| Ni43 | 0.75044 | 0.90762 | 0.18381 |
| Ni44 | 0.74777 | 0.40969 | 0.28065 |
| Nb1  | 0.24609 | 0.25057 | 0.37786 |
| Nb2  | 0.25604 | 0.88823 | 0.38722 |
| Nb3  | 0.74656 | 0.25102 | 0.37806 |
| Nb4  | 0.75446 | 0.88806 | 0.38714 |
| N1   | 0.12758 | 0.57473 | 0.11541 |
| N2   | 0.12393 | 0.07732 | 0.21492 |
| N3   | 0.12774 | 0.57676 | 0.31331 |
| N4   | 0.12204 | 0.07554 | 0.42257 |
| N5   | 0.37179 | 0.91241 | 0.11562 |
| N6   | 0.37635 | 0.41093 | 0.21537 |
| N7   | 0.37696 | 0.90527 | 0.31162 |
| N8   | 0.38038 | 0.42114 | 0.4191  |
| N9   | 0.62761 | 0.57473 | 0.11543 |
| N10  | 0.62392 | 0.07729 | 0.21494 |
| N11  | 0.62811 | 0.5769  | 0.31342 |
| N12  | 0.61994 | 0.07459 | 0.42271 |
| N13  | 0.87185 | 0.91237 | 0.11561 |
| N14  | 0.87636 | 0.41089 | 0.21534 |
| N15  | 0.87682 | 0.9053  | 0.31161 |
| N16  | 0.87845 | 0.42059 | 0.41992 |
| H1   | 0.49431 | 0.57899 | 0.50967 |

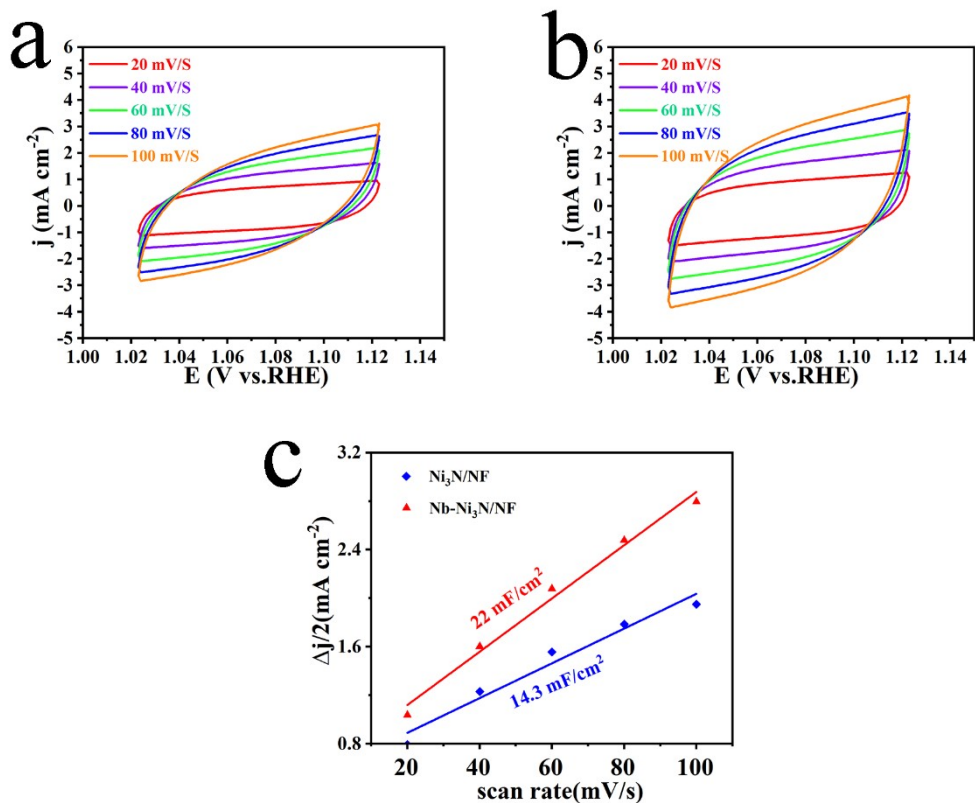

**Fig S8.** CV scans for OER of (a) Ni<sub>3</sub>N/NF, (b) Nb-Ni<sub>3</sub>N-0.05/NF and (c) the capacitive current at 1.073 V vs. RHE.

**Table S4.** Comparison of the HER and/or OER performance of Nb-Ni<sub>3</sub>N/NF with other reported electrocatalysts.

| Catalysts                                | Electrolytes | HER              |                                     | OER              |                                     | Reference |
|------------------------------------------|--------------|------------------|-------------------------------------|------------------|-------------------------------------|-----------|
|                                          |              | $\eta_{10}$ (mV) | Tafel slope (mV dec <sup>-1</sup> ) | $\eta_{10}$ (mV) | Tafel slope (mV dec <sup>-1</sup> ) |           |
| Ni <sub>3</sub> N/NF                     | 1M KOH       | 121              | 109                                 | -                | -                                   | 1         |
| Ni <sub>3</sub> N/C                      | 1M KOH       | 64               | 48                                  | -                | -                                   | 2         |
| TiN@Ni <sub>3</sub> N                    | 1M KOH       |                  |                                     | 350              | 93.7                                | 3         |
| Ni <sub>3</sub> N-VN/NF                  | 1M KOH       | 64               | 37                                  |                  |                                     | 4         |
| NiCoN NWs                                | 1M NaOH      | 145              | 105.2                               | 360              | 46.9                                | 5         |
| Epitaxial in-growth Co-Ni <sub>3</sub> N | 1M KOH       | -                | -                                   | 304              | 57                                  | 6         |
| Nb-Ni <sub>3</sub> N/NF                  | 1M KOH       | 53               | 112                                 | 302              | 75                                  | This work |

## References

1. Z. Xing, Q. Li, D. Wang, X. Yang and X. Sun, *Electrochimica Acta*, 2016, **191**, 841-845.
2. W. Ni, A. Krammer, C.-S. Hsu, H. M. Chen, A. Schüler and X. Hu, *Angewandte Chemie International Edition*, 2019, **58**, 7445-7449.
3. Q. Zhang, Y. Wang, Y. Wang, A. M. Al-Enizi, A. A. Elzatahry and G. Zheng, *Journal of Materials Chemistry A*, 2016, **4**, 5713-5718.
4. H. Yan, Y. Xie, A. Wu, Z. Cai, L. Wang, C. Tian, X. Zhang and H. Fu, *Advanced Materials*, 2019, **31**, 1901174.
5. L. Han, K. Feng and Z. Chen, *Energy Technology*, 2017, **5**, 1908-1911
6. C. Zhu, A.-L. Wang, W. Xiao, D. Chao, X. Zhang, N. H. Tiep, S. Chen, J. Kang, X. Wang, J. Ding, J. Wang, H. Zhang and H. J. Fan, *Advanced Materials*, 2018, **30**, 1705516.
